# Supplementary material for: Adaptive radiation by waves of gene transfer leads to fine-scale resource partitioning in marine microbes
Source: Springer Nature journal article supplement (doi:10.1038/ncomms12860), 2016-09-22
Supplement: 41467_2016_BFncomms12860_MOESM2067_ESM.pdf [file 41467_2016_BFncomms12860_MOESM2067_ESM.pdf]

## Supplementary Figures

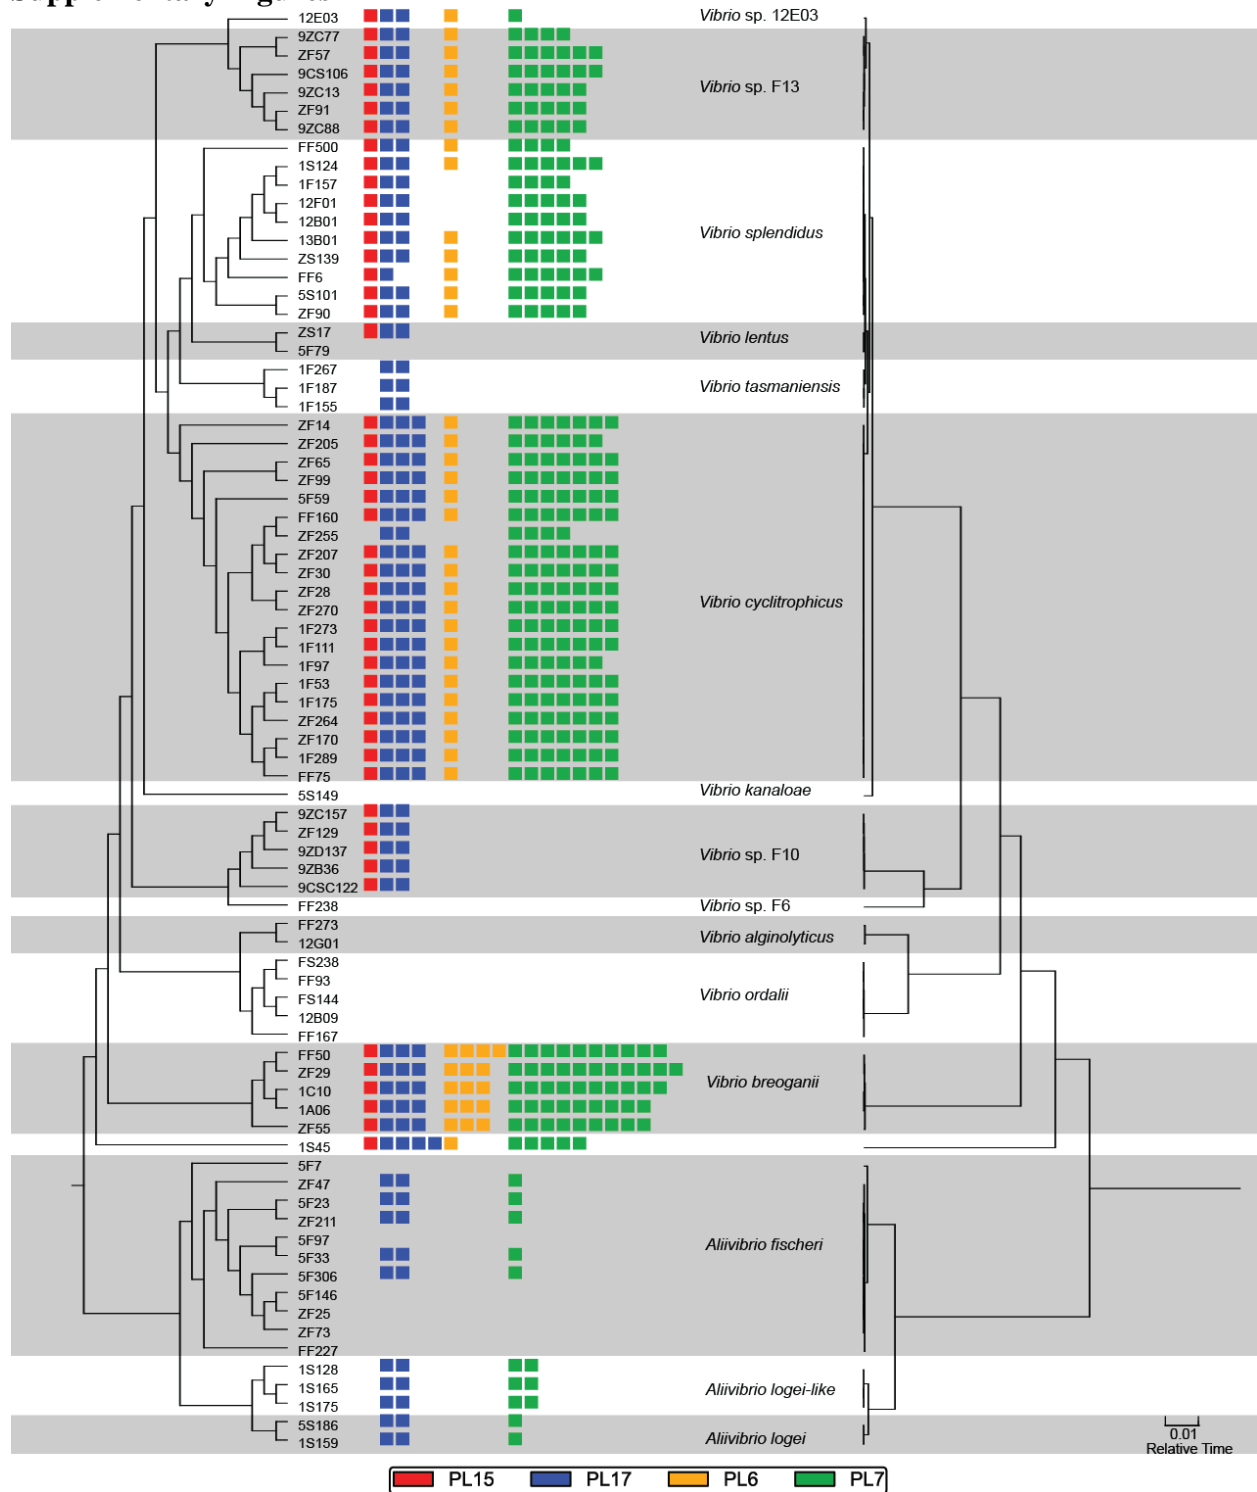

**Supplementary Figure 1. Aly and Oal domain dosage with maximum likelihood phylogeny of 78 *Vibrionaceae* strains.** Presence of different Aly and Oal domains is indicated by colored rectangles. Alternating gray and white bars indicate different populations. The left phylogeny depicts the topology (without proper branch lengths) of the maximum likelihood ribosomal protein timed phylogeny on the right.

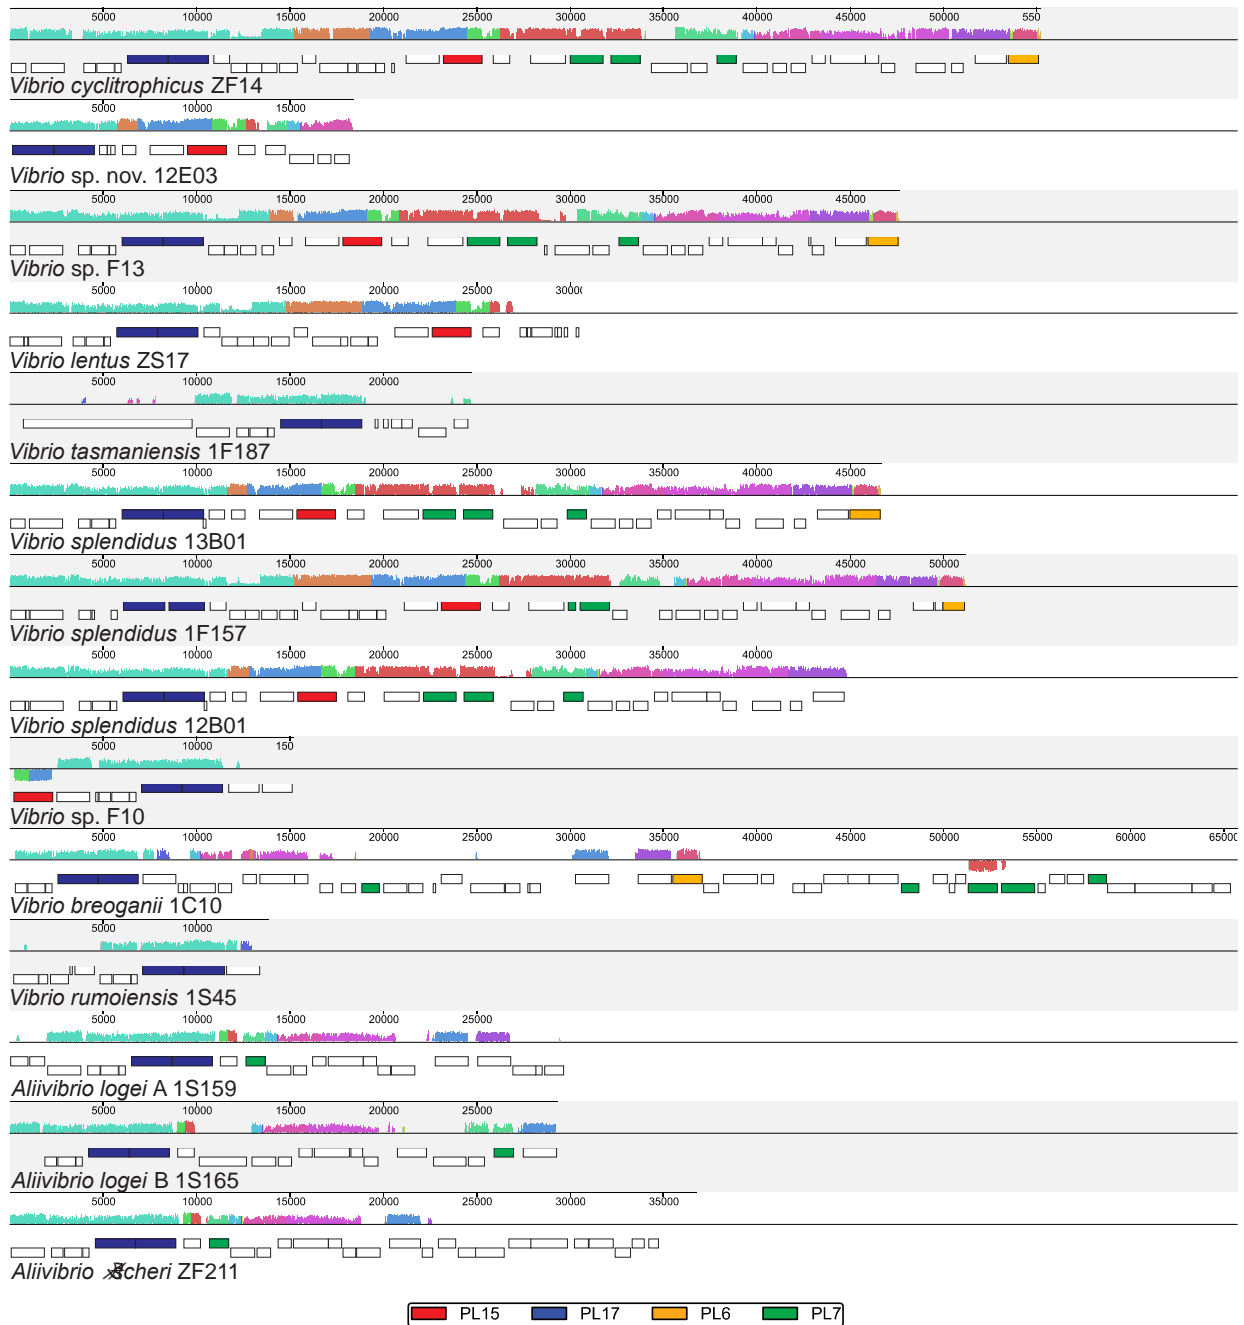

**Supplementary Figure 2. Alignment of genetic islands, shared among different vibrio populations, visualizes the core and the flexible parts of enzyme pathways for the catabolism of alginate.** We identified contigs with homologs of family PL17 oligoalginate lyases that were previously found to be crucial for alginate catabolism in *Vibrio* strain 12B01<sup>1</sup>. Colored rectangles represent alginate and oligoalginate lyase genes located on the forward (top) or reverse strand (bottom) of the DNA sequence. White rectangles represent additional genes involved in alginate catabolism (e.g. transporters, catabolic enzymes), or genes of unknown

function. The colored bar diagrams, plotted above the genes represent similarity profiles, in that the height of each bar corresponds to the average level of conservation in the corresponding, similarly color coded, genomic sequence<sup>2</sup>. Areas that remain white contain parts that are not shared among the compared sequences. The alignment revealed that some genetic islands contain only the PL17 enzymes, while others encode more elaborate pathway architectures with additional Ola genes of family PL15 or Aly genes of family PL6 or PL7. The presence of PL17 among all populations suggested these enzymes belong to the core part of the alginate degradation pathway. The more variable presence of PL6, PL7 and PL15 among different populations suggested these enzymes belong to the flexible part of the alginate degradation pathway. It should be noted that genomes of some of the populations (e.g., *V. breoganii*, *V. splendidus*, *V. cyclitrophicus*, and others) contain additional alginate lyase genes that are part of the alginate pathways but which are not shown in this graphic.

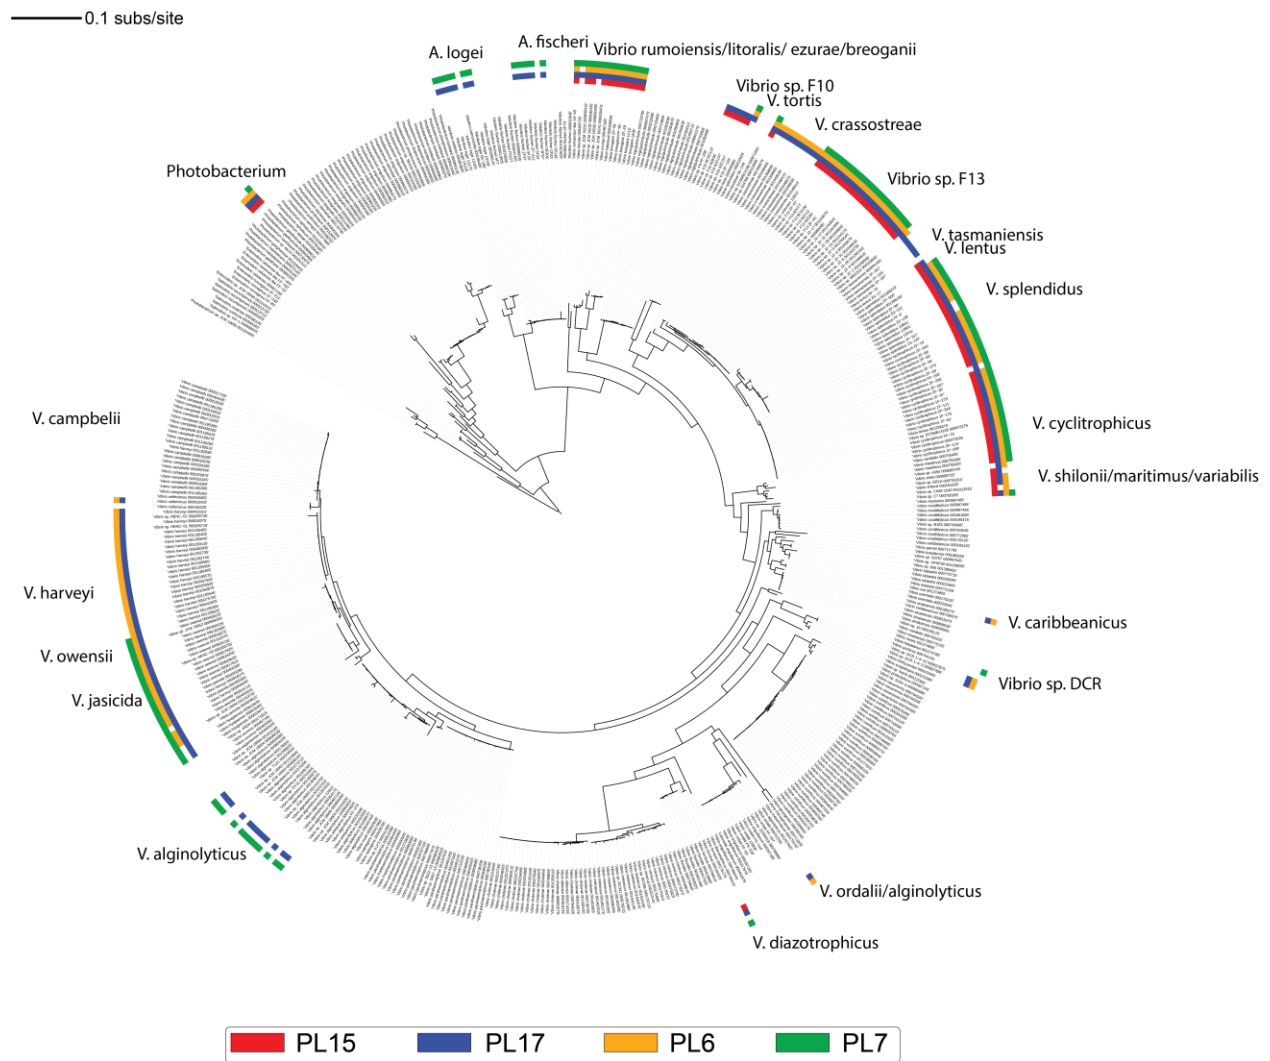

**Supplementary Figure 3. Alginate lyase occurrence in Vibrionaceae.** Analysis of 446 additional genomes retrieved from Genbank revealed patchy presence of Aly genes in 4 additional, very closely related species, including *V. alginolyticus*, which, although represented, lacked PL genes in our collection. Because only insufficient physiological and ecological information is available for these isolates, they were omitted from our analysis. Presence of genes indicated by colored rings around phylogeny. Nodes are labeled with species name and Genbank genome identifier or the name of isolate from 84 genomes in the reference phylogeny.

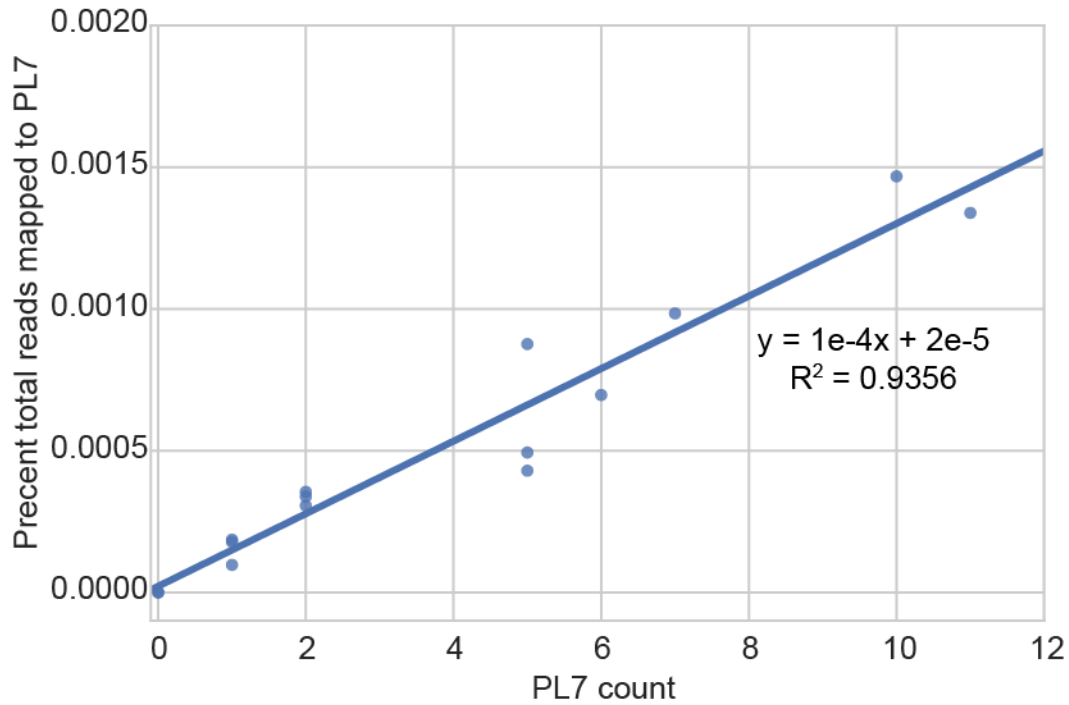

**Supplementary Figure 4. Incomplete genomes do not strongly bias copy number estimation of lyase genes.** Test of potential bias in alginate lyase copy number estimation due to incomplete genomes. Reads from 15 strains were searched against the complete database of PL7 genes with UBLAST. The number of PL7 domains in each strain was compared to the percentage of reads that mapped to any PL7 in order to ascertain confidence in the inferred PL7 count. Line represents least-square linear regression.

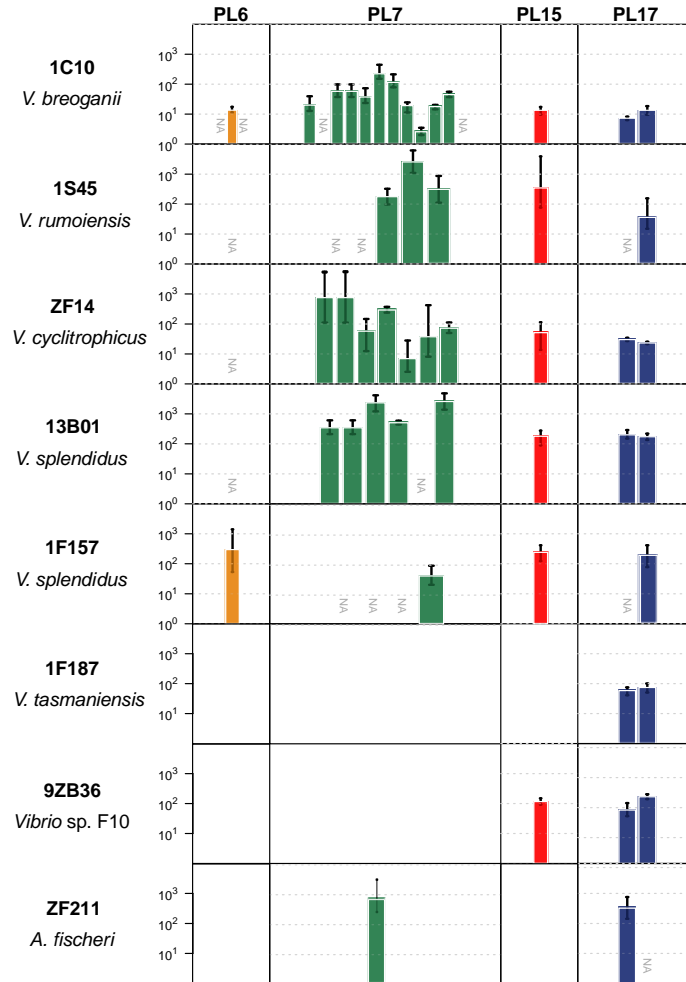

**Supplementary Figure 5. Alginate lyase activity in response to alginate oligosaccharides.** Expression of alginate lyase and oligoalginate lyase genes measured in response to alginate oligosaccharides as sole carbon source showed induction for all tested Aly and Ola genes. Cells were grown in minimal media with glucose or alginate oligosaccharides. NA = existing protein domain not assayed. No plot = Homologs absent in that strain.



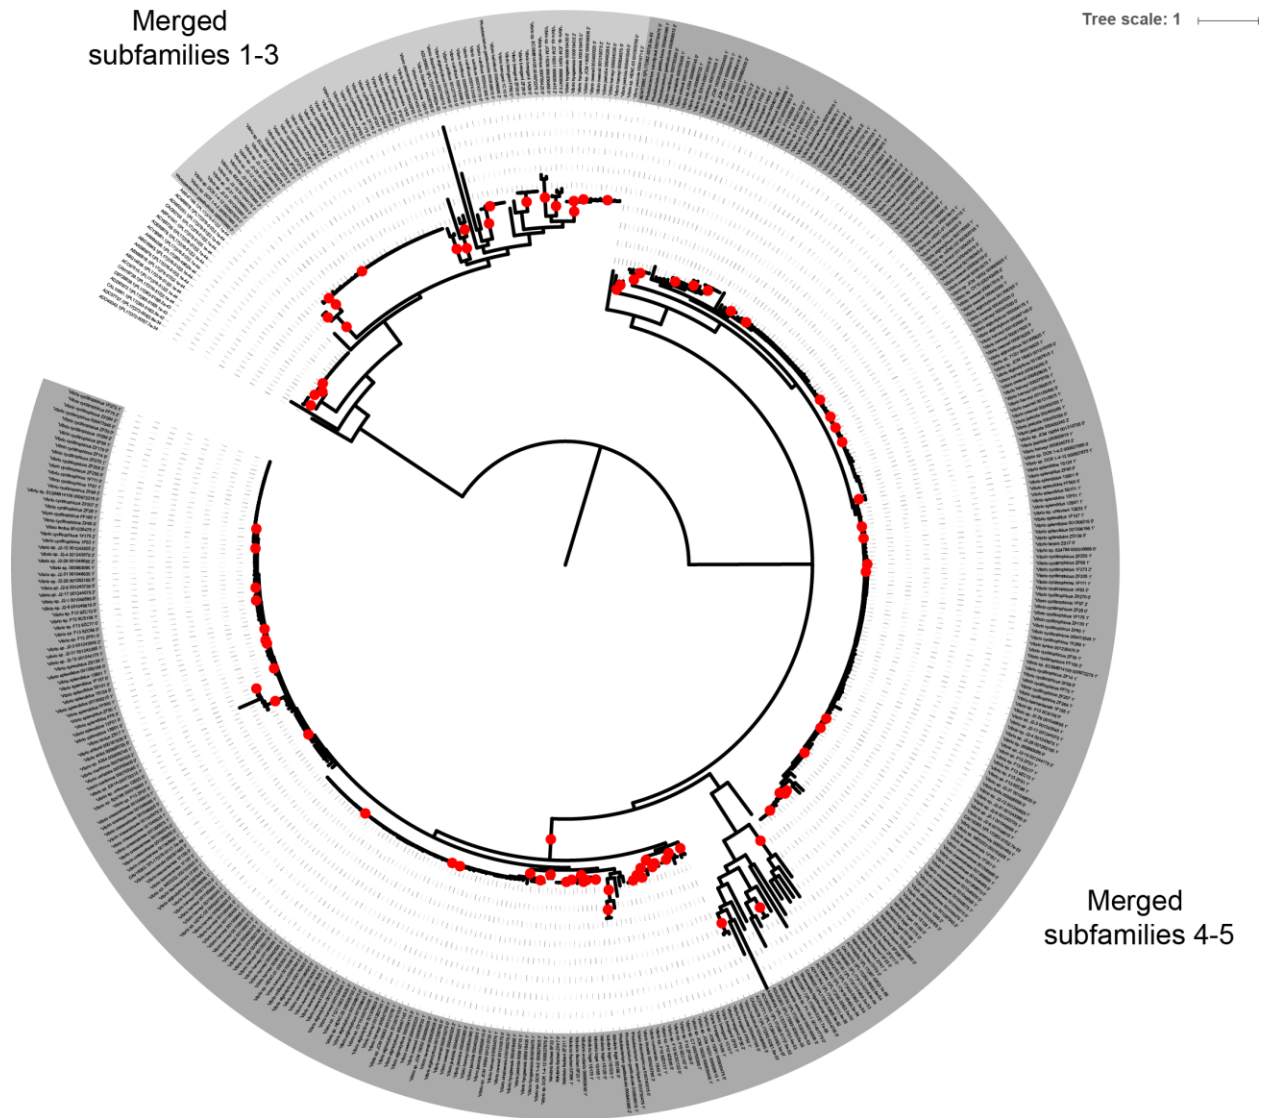

**Supplementary Figure 7. Maximum likelihood phylogeny of PL17 Oal domains.** Leaves highlighted in grey indicate Vibriionaceae-specific clades (i.e., subfamilies). Red circles indicate bootstrap support > 90.



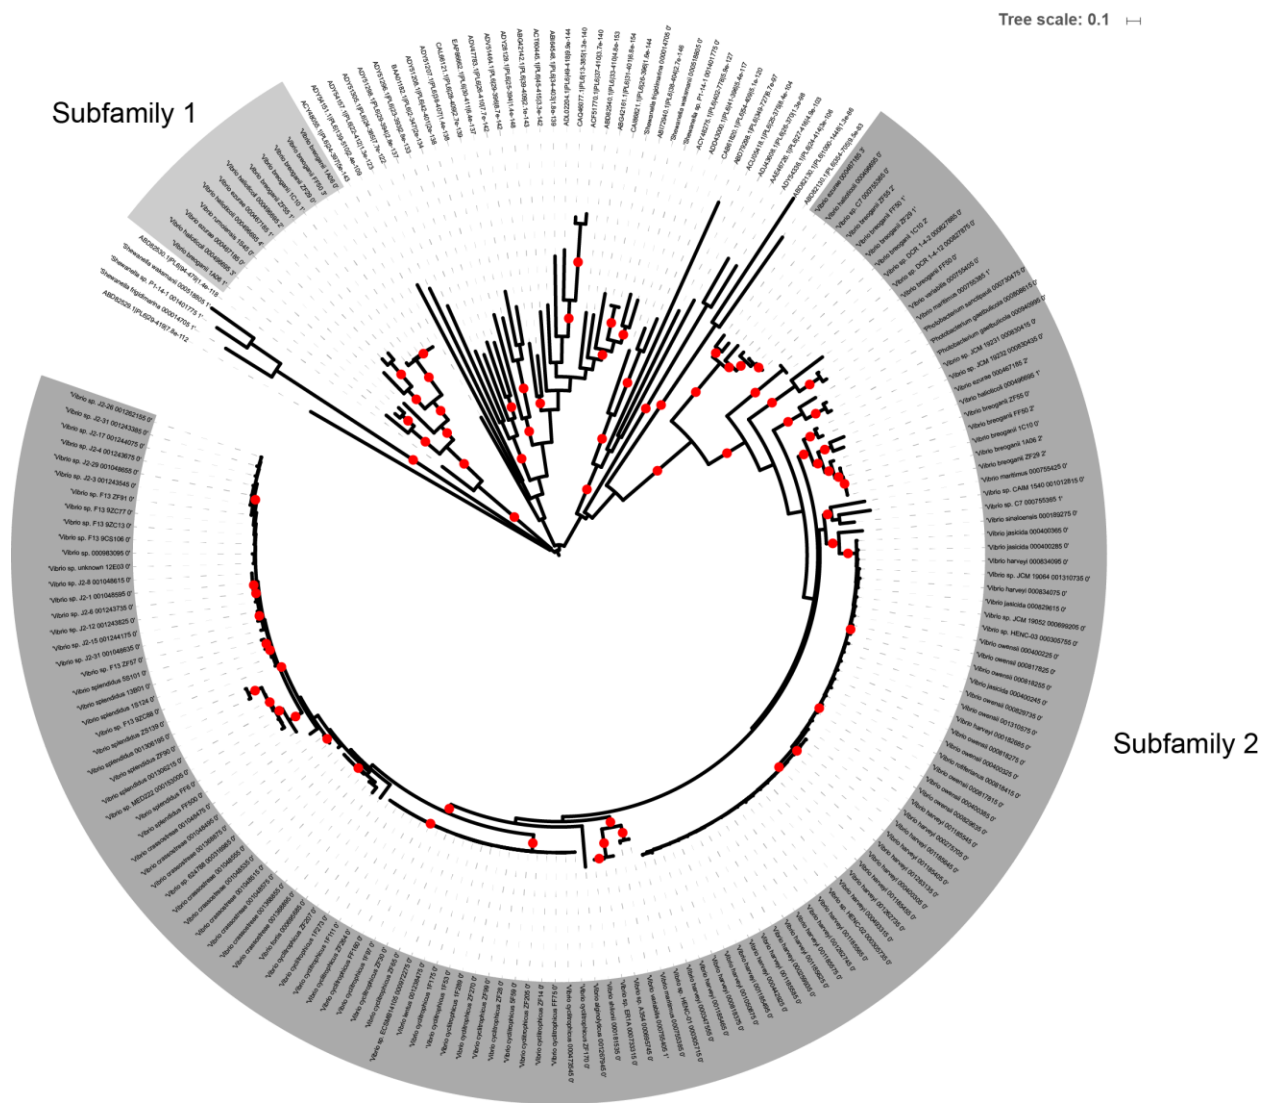

**Supplementary Figure 8. Maximum likelihood phylogeny of PL6 Aly domains.** Leaves highlighted in grey indicate Vibriionaceae-specific clades (i.e., subfamilies). Red circles indicate bootstrap support > 90.

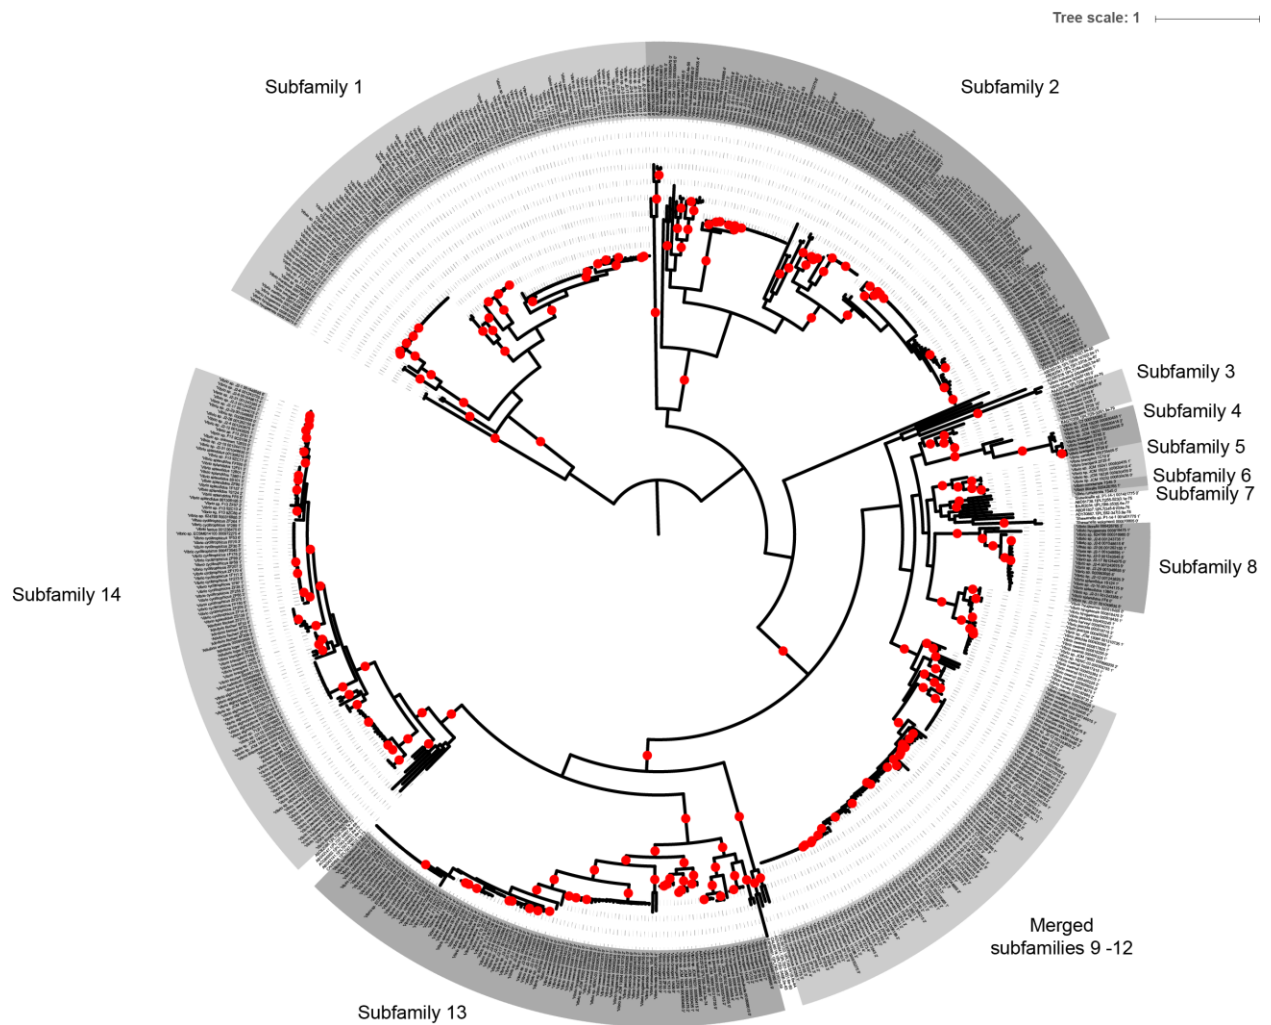

**Supplementary Figure 9. Maximum likelihood phylogeny of PL7 Aly domains.** Leaves highlighted in grey indicate Vibriionaceae-specific clades (i.e., subfamilies). Red circles indicate bootstrap support > 90.

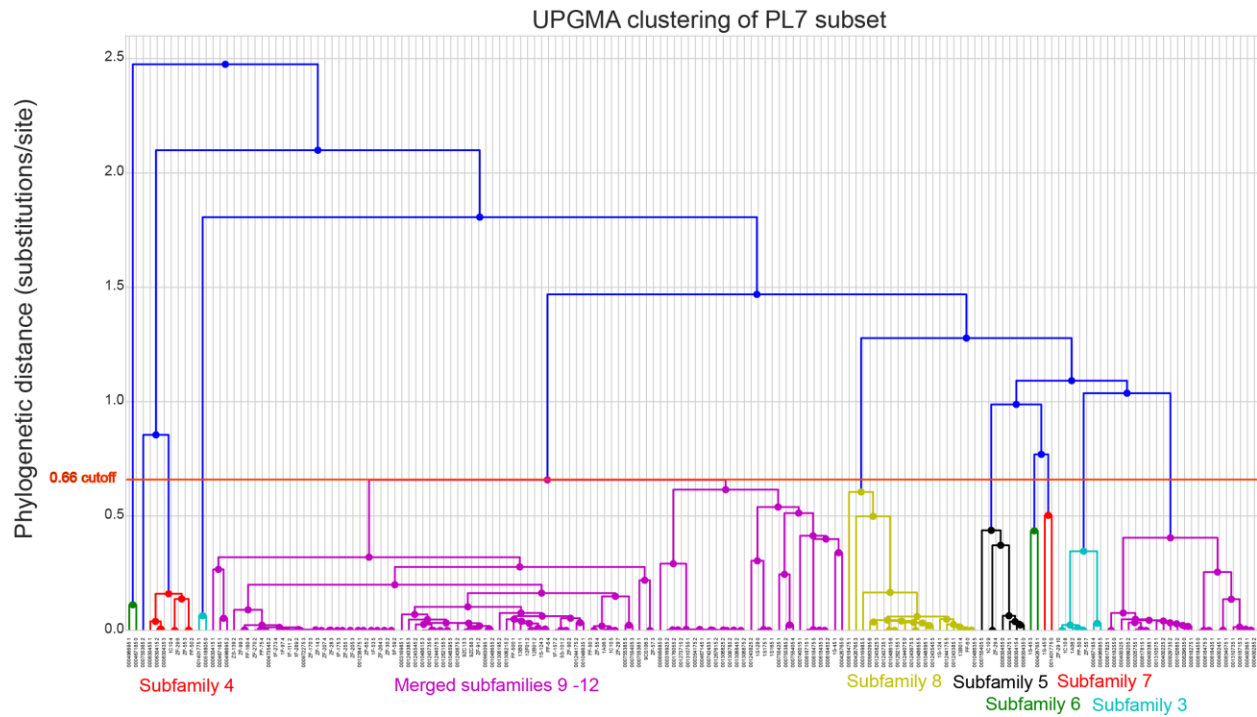

**Supplementary Figure 10. UPGMA clustering of PL7 subfamilies 3 – 12.** PL7 domains were clustered using phylogenetic distance. Orange horizontal line represents the maximum observed divergence from the root of a separate clade of PL7 inferred to have been born in the ancestor of the *Vibrio* and *Aliivibrio*.

## Supplementary Tables

**Supplementary Table 1. GC content depletion analysis.** A hypergeometric test of GC depletion was carried out on genomic regions from strains 9CS106 and FF50 containing Alys or Oals. Bold rows indicate significant depletion after Bonferroni-correction ( $p < 0.05$ ).

| Strain        | Chromosome | Start          | End            | Aly count | Oal count | Region GC content | Chromosome GC Content | Test of GC depletion (Bonferroni-corrected) |
|---------------|------------|----------------|----------------|-----------|-----------|-------------------|-----------------------|---------------------------------------------|
| <b>9CS106</b> | <b>1</b>   | <b>1742212</b> | <b>1780317</b> | <b>3</b>  | <b>3</b>  | <b>43.50%</b>     | <b>44.80%</b>         | <b>7.55E-07</b>                             |
| 9CS106        | 1          | 1783747        | 1795363        | 1         | 0         | 44.20%            | 44.80%                | 0.4                                         |
| 9CS106        | 1          | 2955232        | 2966269        | 1         | 0         | 44.00%            | 44.80%                | 0.2                                         |
| 9CS106        | 2          | 790151         | 801008         | 1         | 0         | 44%               | 44.30%                | 1.19                                        |
| FF50          | 1          | 1613676        | 1626393        | 1         | 0         | 44.90%            | 45.50%                | 1.27                                        |
| <b>FF50</b>   | <b>1</b>   | <b>2177537</b> | <b>2195646</b> | <b>1</b>  | <b>1</b>  | <b>44.20%</b>     | <b>45.50%</b>         | <b>4.00E-03</b>                             |
| FF50          | 1          | 2199842        | 2211062        | 1         | 0         | 44.80%            | 45.50%                | 0.95                                        |
| <b>FF50</b>   | <b>2</b>   | <b>192021</b>  | <b>202881</b>  | <b>1</b>  | <b>0</b>  | <b>43.00%</b>     | <b>44.80%</b>         | <b>1.00E-03</b>                             |
| FF50          | 2          | 438021         | 452318         | 0         | 2         | 45.00%            | 44.80%                | 8.9                                         |
| <b>FF50</b>   | <b>2</b>   | <b>454863</b>  | <b>465810</b>  | <b>1</b>  | <b>0</b>  | <b>42.00%</b>     | <b>44.80%</b>         | <b>2.37E-08</b>                             |
| FF50          | 2          | 470497         | 482068         | 1         | 0         | 43.70%            | 44.80%                | 0.127                                       |
| FF50          | 2          | 484045         | 518229         | 5         | 0         | 44.70%            | 44.80%                | 4.75                                        |
| <b>FF50</b>   | <b>2</b>   | <b>1193193</b> | <b>1204761</b> | <b>1</b>  | <b>0</b>  | <b>43.00%</b>     | <b>44.80%</b>         | <b>6.00E-04</b>                             |
| FF50          | 2          | 1222411        | 1233406        | 1         | 0         | 45.40%            | 44.80%                | 11.83                                       |
| FF50          | 2          | 1262647        | 1274725        | 0         | 1         | 44.20%            | 44.80%                | 1.59                                        |
| FF50          | ECE1       | 0              | 7721           | 1         | 0         | 44.30%            | 44.30%                | 6.96                                        |
| FF50          | ECE1       | 227710         | 239272         | 1         | 0         | 44.50%            | 44.30%                | 8.39                                        |

**Supplementary Table 2: Genome accession numbers.**

| <b>Strain</b> | <b>Old Accession</b> | <b>New Accession</b> |
|---------------|----------------------|----------------------|
| 12B01         | AAMR01000000         | N/A                  |
| 12G01         | AAPS01000000         | N/A                  |
| 1F111         | AHTI01000000         | AHTI02000000         |
| 1F53          | AICZ01000000         | AICZ02000000         |
| 1F97          | AIDA01000000         | AIDA02000000         |
| 1F175         | AIDB01000000         | AIDB02000000         |
| 1F273         | AIDC01000000         | AIDC02000000         |
| 1F289         | AIDD01000000         | AIDD02000000         |
| FF75          | AIDE01000000         | AIDE02000000         |
| ZF14          | AIDH01000000         | AIDH02000000         |
| ZF28          | AIDI01000000         | AIDI02000000         |
| ZF30          | AIDJ01000000         | AIDJ02000000         |
| ZF65          | AIDK01000000         | AIDK02000000         |
| ZF99          | AIDL01000000         | AIDL02000000         |
| ZF170         | AIDM01000000         | AIDM02000000         |
| ZF207         | AIDN01000000         | AIDN02000000         |
| ZF205         | AIDO01000000         | AIDO02000000         |
| ZF264         | AIDQ01000000         | AIDQ02000000         |
| ZF270         | AIDR01000000         | AIDR02000000         |
| 12F01         | AIDS01000000         | N/A                  |
| FF160         | AIDF01000000         | AIDF02000000         |
| FF454         | AJWN01000000         | AJWN02000000         |
| 9ZC13         | AJYZ01000000         | AJYZ02000000         |

| <b>Strain</b> | <b>Old Accession</b> | <b>New Accession</b>    |
|---------------|----------------------|-------------------------|
| 9ZC77         | AJZA01000000         | AJZA02000000            |
| ZF91          | AJZC01000000         | AJZC02000000            |
| 1.20E+04      | AJZD01000000         | AJZD02000000            |
| ZF90          | AJZF01000000         | AJZF02000000            |
| FF238         | AJYW01000000         | AJYW02000000            |
| 5S149         | AJYX01000000         | AJYX02000000            |
| 9CS106        | AJYY01000000         | CP016228.1 - CP016231.1 |
| 9ZC88         | AJZB01000000         | AJZB02000000            |
| ZS139         | AJZE01000000         | AJZE02000000            |
| 5S101         | AJZG01000000         | AJZG02000000            |
| FF500         | AJZH01000000         | AJZH02000000            |
| 1S124         | AJZL01000000         | AJZL02000000            |
| FF6           | AJZI01000000         | AJZI02000000            |
| 1F157         | AJZJ01000000         | AJZJ02000000            |
| 1F267         | AJZO01000000         | AJZO02000000            |
| 1F155         | AJZN01000000         | AJZN02000000            |
| 1F187         | AJZM01000000         | AJZM02000000            |
| ZS17          | AJZQ01000000         | AJZQ02000000            |
| 1C10          | AKXW01000000         | AKXW02000000            |
| FF33          | AJYD01000000         | AJYD02000000            |

| <b>Strain</b> | <b>Old Accession</b> | <b>New Accession</b>    |
|---------------|----------------------|-------------------------|
| FF162         | AJYE01000000         | AJYE02000000            |
| FF85          | AJYF01000000         | AJYF02000000            |
| 1F211         | AJYG01000000         | AJYG02000000            |
| 1F230         | AJYH01000000         | AJYH02000000            |
| 5S186         | AJYJ01000000         | AJYJ02000000            |
| 1S45          | AJYK01000000         | AJYK02000000            |
| ZF55          | AJYL01000000         | AJYL02000000            |
| ZF29          | AJYM01000000         | AJYM02000000            |
| 9ZD137        | AJYO01000000         | AJYO02000000            |
| 9ZC157        | AJYP01000000         | AJYP02000000            |
| ZF129         | AJYQ01000000         | AJYQ02000000            |
| FF167         | AJYR01000000         | AJYR02000000            |
| FF93          | AJYT01000000         | AJYT02000000            |
| FS144         | AJYU01000000         | AJYU02000000            |
| 12B09         | AJYV01000000         | AJYV02000000            |
| FS238         | AJYS01000000         | AJYS02000000            |
| ZF211         | AJYI01000000         | AJYI02000000            |
| 9ZB36         | AJYN01000000         | AJYN02000000            |
| FF50          | N/A                  | CP016177.1 - CP016179.1 |
| 5F97          | N/A                  | MAJN01000000            |
| 5F33          | N/A                  | MAJO01000000            |
| 5F306         | N/A                  | MAJP01000000            |
| 5F23          | N/A                  | MAJQ01000000            |
| 5F146         | N/A                  | MAJR01000000            |
| 1S175         | N/A                  | MAJS01000000            |
| 1S165         | N/A                  | MAJT01000000            |
| 1S159         | N/A                  | MAJU01000000            |

| <b>Strain</b> | <b>Old Accession</b> | <b>New Accession</b> |
|---------------|----------------------|----------------------|
| 1S128         | N/A                  | MAJV01000000         |
| FF227         | N/A                  | MAJW01000000         |
| ZF73          | N/A                  | MAJX01000000         |
| ZF47          | N/A                  | MAJY01000000         |
| 9CSC122       | N/A                  | MAJZ01000000         |
| 5F79          | AJZP01000000         | MAKA01000000         |
| 5F59          | N/A                  | MAKB01000000         |
| FF273         | N/A                  | MAKC01000000         |
| ZF57          | N/A                  | MAKD01000000         |
| ZF255         | AIDP01000000         | MAKE01000000         |
| 13B01         | N/A                  | MAKF01000000         |
| 1A06          | N/A                  | MAKG01000000         |
| 5F7           | N/A                  | MCGJ01000000         |
| ZF25          | N/A                  | MCGK01000000         |

\* N/A=not applicable



**Supplementary Table 3. Oligonucleotides for quantitative amplification of cDNA of alginate lyase genes.**

|              | <b>Forward</b>        | <b>Reverse</b>        |
|--------------|-----------------------|-----------------------|
| 1C10_PL6_1   | TGGCGAAGAGCTTGACCAAT  | TACACGGTGAGTCTGGTTGC  |
| 1C10_PL6_2   | GGTCAGATTGACGGGCTTGA  | TAGGTTAGTTGCGCCCACTG  |
| 1C10_PL6_4   | AAACACGCCACGGTACTCAT  | CTGCCGCTCGCTTTTGTATC  |
| 1C10_PL7_1   | GCTTACTGGGAACACCTGCT  | GAGTGCTCGGAAGTGAGCTT  |
| 1C10_PL7_2   | GTGGGTGACTTGACTGCTGA  | TCGCCAAGAGCGATAACCATC |
| 1C10_PL7_3   | CTCTGAGCTGCGTCAAATGC  | GCTTGATAGTGCCCACTGGT  |
| 1C10_PL7_4   | CGATTACAGCAAGCGTCGTG  | ATCTTCTGAACCTTGCGCGCA |
| 1C10_PL7_5   | GGCACAGCTCAAGCAAATC   | GCCCCAAGCGAACGATTTAC  |
| 1C10_PL7_6   | TGACGGGCGATCACAAAAGA  | TGGCAGCGAGGTGTTAAAGT  |
| 1C10_PL7_7   | AAACTGGCAGGTAGGTCGTG  | GCGTGGTTCATGTGCAAAGT  |
| 1C10_PL7_8   | ACGCGTCATTGCTAACTCCA  | AGTTGCCTTCGCCAACGATA  |
| 1C10_PL7_9   | TCCGTTCTCTGTTTCTGGC   | TGCCGCGAGTGCTAATAGAG  |
| 1C10_PL7_10  | CGGCTCGGTTTACTGGAAT   | CCCATCTTGCGGGTCTTCTT  |
| 1C10_PL15_1  | ATTCGGTGGCGAAGGTCAAT  | ACTTGTAAGAAGCCGTCGCA  |
| 1C10_PL15_2  | CGAATGGACCAGAACCACCA  | GTGATAACGGATGCGGTTGC  |
| 1C10_PL17_1  | AAACGGCGTAGTAGGCAACA  | GAGACGCATCGTTCATTGCC  |
| 1C10_PL17_2  | CAAGGTGAGAAAGGCGGTCT  | ACCAAACCAGATAAAGCGCCA |
| 1C10_PL17_4  | CACAACACGCTTGCGGTAAT  | GTGACCAATCCACCTCAGCA  |
| 12B01_PL7_1  | AGGTCAACGGCTCAAACGAT  | CAGGTTCTAGTTCAGCCGCA  |
| 12B01_PL7_2  | TGGGTATTCTCAAGCGCTCC  | TCATTTCGATTACCCGTCGT  |
| 12B01_PL7_3  | AAGCTGGAACCGTTATGGG   | AGCGATATCGGCACGGTTAG  |
| 12B01_PL7_4  | ACAAGCCATAAGAACGCGGA  | CCGACCCATGGATTGACCA   |
| 12B01_PL15_1 | GGTCAGTACGGCGAGAACAA  | CGCCCGCTTCGATACAAAAG  |
| 12B01_PL17_1 | AGCTGGTCGCATGTTCTTGA  | AAACGACCTGTTGGGTTGGT  |
| 12B01_PL17_2 | TGCTCAACTGTAGGCGGTTT  | CACTTCAGCGAACACACACG  |
| 13B01_PL7_1  | AGGTCAACGGCTCAAACGAT  | CAGGTTCTAGTTCAGCCGCA  |
| 13B01_PL7_2  | TGGGTATTCTCAAGCGCTCC  | TCATTTCGATTACCCGTCGT  |
| 13B01_PL7_3  | AAGCTGGAACCGTTATGGG   | AGCGATATCGGCACGGTTAG  |
| 13B01_PL7_4  | CGCGGAAGAGTTTGGCTCTA  | CCGACCCATGGATTGACCA   |
| 13B01_PL7_8  | AAGGCGCAATCTACTTCGCT  | CAATTCCGCCACTTGGGTTG  |
| 13B01_PL15_1 | TTTCGCAAACGAAGTGGCAG  | GGGTCAACTTCGCCAAAACC  |
| 13B01_PL17_1 | CGTGTGTGTTTCGCTGAAGTG | ACGCCGCCTTTGTAGTTGTA  |
| 13B01_PL17_2 | TCATGGCAACGTCTGTGTGT  | AGGCTACCCAGTTGAATGC   |
| 1F157_PL6_1  | AGGCAACACGGTTGAGAACA  | GCCTTCGATCAAACCATCGC  |
| 1F157_PL7_4  | TGCAAGCACGCTACGTAAGA  | TATGGCTAGCAGGACATGGG  |
| 1F157_PL7_5  | AGTAACCGGAACGCACGAAT  | CCCCTGCAATTTGACCAGC   |
| 1F157_PL15_1 | CAACCAACTGAAAGGCCGTG  | CGTAACCGAAGTCCCACCAA  |
| 1F157_PL17_1 | GTTACGCGATTTCGTCCAACG | ACGCCGCCTTTGTAGTTGTA  |
| 1F157_PL17_2 | GCATTCAACTGGGGTAGCCT  | AACCAGATCAACGCCATCGT  |
| common_GyrB  | GGGCGTAACCGTAAGAACCA  | ACCACAACCAAGTGCTGTGA  |

|              | <b>Forward</b>        | <b>Reverse</b>        |
|--------------|-----------------------|-----------------------|
| common_RpoD  | AGACACCAATCGGTGACGAC  | CTTGTTGCCGTTGCAGAGTC  |
| 1F187_PL17_1 | AAATTCGGCGGTTCGTTACCT | AAGCCGTGTACTGAGTCTGC  |
| 1F187_PL17_2 | TACATGGCGGAAGTTGGCAT  | GGAACAAACGACCCGCTAGA  |
| ZF14_PL6_1   | ATGGGAATACGTTGGCCGTT  | ACGACTTCGTCGCCATCTTT  |
| ZF14_PL7_1   | GGTACGGCACTACGACACAA  | CCGGTTGTGCATTGCTTTGA  |
| ZF14_PL7_2   | ACCGGTAATGCGAACGAAGT  | CGTGTGCAAAGTAAACCGCA  |
| ZF14_PL7_3   | CAGAGCGTCACGATACGGTT  | TCTTCAGCATAGCCCGTTGG  |
| ZF14_PL7_4   | CTTGACCCTGCAAAGCACC   | TCGGGTGAACGTAAGGTGTG  |
| ZF14_PL7_5   | AAGCCGGTACGTGTTGTTCT  | GGCTGACAGTCGCTACACAT  |
| ZF14_PL7_6   | TGAAGGGCATTCTGGGCAA   | CTGTTGGTTTGCCTTCTGGC  |
| ZF14_PL15_1  | TCAAGCACTATGCGGGTGTT  | CGTAACCGAAGTCCCACCAA  |
| ZF14_PL17_1  | AGCGAGTGGTGAAGTGGATG  | TAGCACCAGTGCAGTGAAG   |
| ZF14_PL17_2  | ACGATCTTCCCGTTCACCAC  | CTTTGCCTGAAGCCACGTTT  |
| ZF14_PL17_4  | GGGATAGAGACCGACCCACT  | GGTTCCCAGTAAGCACCTC   |
| ZF14_GyrB    | GGTCTTACGCTGGTGGTA    | CCGTGGCTGTAGGTTTGAAGT |
| ZF14_RpoD    | TGGAACAGTTTGACCGCGTA  | CATCGTCGTCTGGGTCAACA  |
| 1S45_PL6_1   | TCATGGGCGGGCAATATACC  | TCATGAGTGCCAAAGCGAGT  |
| 1S45_PL7_2   | GCAAGTGGTGATGGGCAATG  | ACCCAATAACGCCACCTGAG  |
| 1S45_PL7_3   | GTGTGGGCAATACATGGGA   | TTGTCATGCTTAGCGGTCGT  |
| 1S45_PL7_4   | TGATGATAAGCCGGGTCGTG  | AACGCGGAAAACCATTGCTC  |
| 1S45_PL7_8A  | GATGGCTGGAACGATAGCGA  | GATTCCAGAGCCAGTCACCC  |
| 1S45_PL7_8B  | CAATGGCCGCGTAGCTTTAC  | GAACTCGATGAGCCACCACA  |
| 1S45_PL15_1  | GAGAACGATACCTCGGCAGG  | AATAAGAAGACGTGGGCGGG  |
| 1S45_PL17_1  | TACAAGTGGCAGTGAGCCAG  | CTTGGCCAGAAAGGCAAACC  |
| 1S45_PL17_2  | TATGCCACGGTGTACCCAAC  | CGGAGGGTTAGTATCACGGC  |
| 1S45_PL17_3  | AACCAGTGC GACTATTGGGG | AGTTTACCCCTCAGCAAGC   |
| 1S45_PL17_4  | CCGCCGTTGGAATTATTGGC  | AGCAGTGATTGTAGGGCGTC  |
| 1S45_GyrB    | GCGATTCTGCCGCTTAAAGG  | CACGTCCGATACCACAACCA  |
| 1S45_RpoD    | GTATGCGTTTCGGCATCGAC  | TACTCGTCAAGGAAGCTGCG  |
| ZF211_PL7_3  | GATCCACGCGAAGAAACACG  | CCCCAAACAGGGTAAGCGAT  |
| Zf211_PL15_1 | AGGCAAGGAACAAGGCTACC  | TGTCATCAGCATCAGGAGCG  |
| ZF211_PL17_1 | ATTGGCGGTTTACGCAGAGA  | GAAACAAACGACCCGTTGGG  |
| ZF211_PL17_2 | GCTCGTGGGTTGGTAAAAGC  | GTTGTGCGTCTTCAGCTTGG  |
| ZF211_GyrB   | GGGTGAGATGAACCCTGAGC  | CGCGTAATGCGTTCTCTTCG  |
| ZF211_RpoD   | AGGCAAGGAACAAGGCTACC  | TGTCATCAGCATCAGGAGCG  |
| 9ZB36_PL15_1 | ACAACAAGATGACCGAGCGT  | TGACGCTAACGTTTCACCGA  |
| 9ZB36_PL17_1 | GCATCAAGGGTGAGGGTGAA  | GATGCTGATAGCCAGCGTCT  |
| 9ZB36_PL17_2 | ACCGTTACGAGCAAGCTGAA  | TAGGCTGCCCCAGTTGAATG  |
| 9ZB36_GyrB   | AGCAAAACGACTGCGTGAAC  | TGCTTGAATACCGCCTTCGT  |
| 9ZB36_RpoD   | ATGCGTGAAATGGGTACCGT  | TCAGCAACTGCGCTTTGAAC  |

## Supplementary References

1. Wargacki AJ, *et al.* An engineered microbial platform for direct biofuel production from brown macroalgae. *Science* **335**, 308-313 (2012).
2. Darling AE, Mau B, Perna NT. progressiveMauve: multiple genome alignment with gene gain, loss and rearrangement. *PLoS One* **5**, e11147 (2010).
